# Supplementary material for: Correlation of μXRF and LA-ICP-MS in the analysis of a human bone-cartilage sample
Source: Royal Society of Chemistry journal article supplement (doi:10.1039/d1ja00007a), 2021-01-01
Supplement: d1ja00007a2.xlsx [file d1ja00007a2.xlsx]

## Sheet: LA-ICP-MS
NYS measurements
	23Na	24Mg	31P	39K	42Ca	64Zn
NYS_01
I (cps)	1.21788e+06	480075	651431	44506.4	704583	4644.39		mean measured cps
C	6900	4400	124000	220	267000	85		concentration according to NY certificate
C_H5	5554.89	3836.78	121708	120.318	245882	73.3141		concentration calculated with H5 sensitivities
rel error	-19.4944	-12.8005	-1.84875	-45.31	-7.90935	-13.7481
Upper	5925.86	4028.88	134305	147.879	260682	82.066		value obtained by lower limit of H5 sensitivity (95 % CI) = upper limit of concentration
Lower	5227.62	3662.16	111271	101.417	232672	66.2491		value obtained by upper limit of H5 sensitivity (95 % CI) = lower limit of concentration
NYS_02
I (cps)	1.2747e+06	499373	701195		751159	4355.47
C	6800	4200	120000		260000	80
C_H5	5814.07	3991.01	131005		262136	68.7533
rel error	-14.4989	-4.97596	9.17096		0.82146	-14.0584
Upper	6202.36	4190.83	144565		277914	76.9607
Lower	5471.54	3809.37	119771		248053	62.1278
NYS_03
I (cps)	1.24496e+06	484377	660511		718449	4699.48
C	6800	4200	122000		261000	79
C_H5	5678.4	3871.16	123404		250721	74.1838
rel error	-16.4942	-7.82948	1.15085		-3.93833	-6.0965
Upper	6057.63	4064.99	136177		265812	83.0394
Lower	5343.85	3694.98	112822		237251	67.0349
NYS_04
I (cps)	1.09954e+06	426526	608470	39907.4	645854	3753.01
C	6900	4300	125000	210	264000	81
C_H5	5015.14	3408.81	113681	107.885	225387	59.2432
rel error	-27.3167	-20.7253	-9.05507	-48.6262	-14.6262	-26.8603
Upper	5350.08	3579.49	125448	132.598	238953	66.3153
Lower	4719.68	3253.67	103932	90.9368	213278	53.5341

## Sheet: µXRF
NYS measurements
	Ca	P	Zn
NYS_01
I (cps)	2031.3	554.3	1.4	mean measured cps
C	267000	124000	85	concentration according to NY certificate
C_H5	240501	136026	53.9143	concentration calculated with H5 sensitivities
rel error	-9.92469	9.69874	-36.5714
Upper	253048	149870	59.6408	value obtained by lower limit of H5 sensitivity (95 % CI) = upper limit of concentration
Lower	229140	124524	49.1912	value obtained by upper limit of H5 sensitivity (95 % CI) = lower limit of concentration
NYS_02
I (cps)	2103.1	575.4	1.7
C	260000	120000	80
C_H5	249002	141204	65.4674
rel error	-4.22999	17.6704	-18.1658
Upper	261992	155575	72.421
Lower	237239	129264	59.7322
NYS_03
I (cps)	1954	522.9	1.4
C	261000	122000	79
C_H5	231349	128321	53.9143
rel error	-11.3606	5.18099	-31.754
Upper	243418	141380	59.6408
Lower	220420	117470	49.1912
NYS_04
I (cps)	2255.3	612.8	1.6
C	264000	125000	81
C_H5	267022	150382	61.6164
rel error	1.14475	20.306	-23.9304
Upper	280952	165687	68.1609
Lower	254408	137666	56.2185
